# Supplementary material for: Sexual network and detection of anogenital human papillomavirus in a community cohort of men who have sex with men in Taiwan
Source: PLoS One. 2019 May 10;14(5):e0216784. doi: 10.1371/journal.pone.0216784 (PMC6510428; doi:10.1371/journal.pone.0216784)
Supplement: S2 Table — (CSV) [file pone.0216784.s002.csv]

alterid	alterhiv	alterage	alteredu
e500001	4	1	4
e500002	4	2	4
e500003	3	2	5
e238001	3	2
e238002	3	3
e238003	3	2
e238004	3	2
e238005	3	2
e778001	3	3	4
e778002	3	2	4
e778003	3	3	4
e778004	3	3	4
e778005	3	3	4
e578001	5	1	3
e578002	5	2	4
e578003	5	2	5
e578004	5	2	4
e578005	5	1	4
e751001	5	2	5
e751002	5	1	4
e751003	5	1	5
e323001	4	2	4
e323002	4	2	4
e323003	5	1	4
e323004	4	2	4
e323005	3	2	4
e332001	5	2	4
e556001	1	2	4
e556002	5	1	3
e556003	5	2	4
e556004	5	2	4
e556005	5	2	4
e793001	3	2	3
e793002	3	2	3
e168001	5		5
e168002	5		4
e284001	3	2	4
e284002	2	2	4
e305001	3	2	3
e305002	3	2	4
e305003	3	2	4
e305004	3	3	4
e305005	3	2	4
e275001	5	3	3
e275002	1	2	3
e822001	5	2	4
e822002	5	2	5
e435001	5	2	5
e435002		2	4
e435003		2	4
e435004		2	4
e435005		2	4
e185001	4	3	4
e609001	5	3	4
e609002	4	2	4
e609003	5	1	4
e609004	3	2	4
e451001	5	2	4
e380001	3	1	4
e380002	3	1	4
e380003	3	2	4
e380004	3	1	4
e867001	4	1	4
e867002	4	1	3
e867003	5	1	4
e867004	5	1	5
e226001	4	3	4
e317001	5	1	5
e317002	3	2	4
e317003	1	2	4
e317004	3	3	5
e317005	5	2	4
e130001	5	3	4
e130002	5	2	4
e164001	4	1	4
e886001	5	1	4
e886002	5	2	5
e886003	5	2	5
e886004	5	1	4
e886005	4	2	4
e225001	5	2	4
e839001	5	1	4
e585001	5	3	4
e585002	5	2	4
e476001	5	3	4
e298001	5	1	4
e298002	5	2	3
e106001	4	3	4
e192001	5	2	4
e192002	4	1	4
e192003	4	1	4
e192004	4	1	4
e192005	4	1	4
e906001	5	3	5
e363001	5	1	4
e620001	1	2	4
e620002	3	3	3
e620003	5	2	4
e266001	3	1	4
e266002	3	1	4
e266003	3	2	5
e266004	3	2	5
e266005	3	2	3
e390001	5	3	4
e743001	5	1	4
e743002	5	2	4
e743003	5	2	4
e743004	5	1	4
e743005	5	2	4
e975001	5	1	4
e975002	5	2	4
e975003	5	2	4
e975004	5	1	4
e975005	5	2	5
e103001	3	1	3
e902001	3	3	4
e902002	3	2	4
e520001	5	2	5
e520002	3	2	4
e520003	3	1	5
e520004	4	2	5
e520005	5	2	3
e328001	1	2	4
e328002	3	2	3
e328003	3	2	3
e328004	3	2	3
e328005	3	2	4
e606001	3	2	4
e606002	5	2	4
e606003	3	3	4
e606004	5	1	4
e149001	5	2	4
e149002	3	2	4
e149003	3	2	4
e149004	5	2	4
e149005	3	2	4
e810001	3	3	4
e810002	3	1	4
e810003	3	2	4
e810004	3	4	4
e810005	3	2	4
e171001	4	2	4
e171002	4	3	3
e171003	3	2	4
e171004	5	2	5
e171005	3	2	4
e783001	5	4	3
e783002	5	2	4
e783003	5	4	3
e783004	5	3	3
e783005	5	1	3
e125001	3	3	4
e125002	3	3	4
e125003	3	3	4
e125004	3	3	4
e125005	3	2	4
e205001	3	1	4
e396001	5	2	3
e244001	5	2	4
e244002	3	2	4
e244003	4	2	5
e244004	5	2	4
e244005	5	2	4
e313001	3	2	3
e313002	3	2	3
e313003	3	2	3
e313004	3	1	4
e313005	3	2	3
e961001	4	2	5
e961002	4	3	4
e961003	4	2	4
e961004	4	2	5
e961005	4	2	4
e189001	4	1	4
e189002	5	3	4
e374001	3	2	4
e374002	3	3	4
e374003	3	2	4
e374004	3	3	5
e374005	3	3	4
e197001	3	1	4
e197002	2	1	3
e197003	3	2	4
e197004	3	1	3
e197005	3	2	4
e790001	4	1	5
e790002	4	2	4
e790003	4	1	4
e790004	4	1	4
e790005	4	2	5
e852001	3	1	4
e852002	3	1	4
e852003	3	1	3
e852004	3	1	4
e852005	3	2	4
e946001	5	1	4
e946002	5	2	4
e946003	5	2	4
e946004	5	1	4
e946005	5	1	4
e101001	5	2	5
e101002	4	2	4
e101003	4	3	4
e101004	3	2	3
e101005	4	1	4
e562001	5	2	5
e929001	3	1	4
e929002	3	1	4
e989001	5	2	4
e989002	5	1	4
e989003	5	1	4
e989004	5	2	3
e989005	5	1	4
e550001	5	3	5
e550002	3	4	3
e550003	5	2	4
e550004	5	1	4
e550005	5	1	3
e861001	5	2	4
e861002	4	1	4
e861003	5	2	5
e861004	4	1	4
e861005	5	3	5
e721001	5	2	4
e721002	3	2	4
e999001	3	2	4
e999002	3	2	3
e407001	3	2	4
e407002	3	2	3
e835001	5	4	4
e835002	4	2	4
e512001	5	3	5
e512002	5	2	4
e512003	5	2	4
e512004	5	2	5
e512005	5	2	5
e737001	5	2	4
e737002	5	1	5
e737003	5	3	3
e737004	5	2	5
e737005	5	2	5
e749001	5	3	5
e749002	5	1	5
e749003	5	2	4
e749004	5	1	4
e749005	3	4	5
e259001	5	3	4
e259002	5	3	4
e129001	1	1	4
e129002	5	3	4
e771001	1	1	4
e771002	3	2	4
e747001	5	2	4
e240001	4	2	5
e240002	4
e925001	5	2	4
e925002	3	1	4
e434001	4	2	3
e434002	4	3	4
e434003	1	1	3
e434004	5	2	4
e434005	4	2	4
e117001	4	1	4
e117002	4	2	5
e117003	4	2	4
e117004	3	3	3
e117005	4	2	4
e973001	5	2	4
e973002	5	2	4
e973003	5	2	4
e973004	5	2	4
e973005	5	2	4
e277001	5	2	4
e277002	5	2	4
e277003	5	2	5
e277004	5	2	4
e277005	5	3	4
e480001	3	2	3
e696001	4	2	4
e696002	4	2	4
e626001	5	1	3
e626002	5	1	4
e626003	5	2	4
e184001	3	2	4
e184002	3	4	3
e184003	3	1	3
e184004	3	1	4
e184005	3	3	4
e426001	5	1	4
e426002	3	2	4
e426003	3	3	3
e426004	3	2	3
e426005	3	2	4
e144001	5	2	3
e144002	5	2	3
e144003	5	2	4
e144004	5	3	3
e144005	5	2	4
e122001	3	3	3
e400001	3	2	5
e400002	1	2	5
e400003	5	2	5
e400004	5	2	4
e400005	5	3	4
e105001	4	1	4
e105002	4	1	5
e105003	4	2	5
e105004	3	1	4
e105005	4	1	4
e140001	5	3	4
e594001	5	1	4
e296001	5	2	4
e597001	1	2	4
e597002	3	2	4
e597003	3	3	3
e516001	5	2	4
e877001	5	2	5
e942001	4	2	4
e942002	4	2	4
e942003	5	2	4
e942004	4	2	4
e942005	4	1	4
e505001	3	3	4
e505002	3	2	4
e409001	4	2	5
e409002	4	2	4
e409003	3	3	4
e409004	3	2	4
e409005	3	2	4
e656001	4	1	4
e656002	3	2	4
e656003	3	2	4
e656004	4	2	4
e656005	4	2	4
e795001	5	1	4
e795002	5	1	4
e795003	5	2	5
e795004	5	1	5
e795005	5	2	4
e465001	3	3	3
e465002	3	3	4
e465003	3	4	5
e465004	3	3	4
e465005	3	3	4
e546001	5	1	5
e962001	5	3	5
e962002	5	4	5
e962003	5	4	5
e962004	5	3	5
e962005	3	3	4
e596001	5	1	4
e596002	5	2	4
e596003	5	1	3
e622001	5	1	4
e622002	5	2	4
e622003	5	2	4
e622004	5	1	4
e622005	5	1	4
e475001	5	2	5
e475002	4	2	5
e475003	4	2	5
e719001	5	1	4
e719002	3	2	4
e719003	5	4	4
e163001	3	2	5
e163002	3	3
e163003	3	2
e163004	5	2	3
e163005	5	2	4
e360001	3	2	3
e360002	3	2	3
e360003	5	2	4
e958001	4	1	4
e958002	3	1	4
e958003	4	1	4
e958004	3	2	4
e958005	3	2	4
e450001	5	1	4
e450002	4	2	4
e450003	3	2	4
e119001	3	2	4
e593001	1	3	5
e985001	4	1	4
e985002	4	2	4
e678001	3	2	3
e678002	3	4	3
e678003	3	2	4
e678004	3	2	4
e678005	3	3	4
e629001	4	3	5
e629002	4	2	5
e629003	4	2	5
e469001	5	1	4
e469002	5	1	4
e469003	5	2	4
e469004	5	1	4
e943001	4	4	4
e943002	5	4	4
e943003	4	2	4
e943004	4	2	4
e943005	5	2	3
e218001	4	2	4
e218002	4	1	4
e218003	4	2	4
e218004	5	2	4
e218005	5	2	4
e438001	3	1	3
e438002	3	2	3
e438003	3	1	4
e438004	3	1	3
e438005	3	2	4
e628001	5	2	3
e628002	5	2	4
e628003	5	2	4
e628004	5	2	4
e628005	5	2	4
e745001	5	3	3
e745002	4	3	4
e568001	4	2	4
e568002	4	2	5
e568003	4	2	4
e568004	4	1	4
e568005	4	2	5
e955001	5	1	3
e955002	3	2	5
e955003	3	2	5
e955004	3	2	4
e955005	3	2	4
e481001	5	4	3
e878001	3	2	4
e878002	3	1	4
e878003	3	2	4
e878004	4	1	4
e878005	4	1	4
e659001	5	2	4
e659002	4	1	5
e659003	4	1	4
e659004	5	2	3
e541001	5	1	4
e541002	4	1	4
e541003	5	2	4
e823001	5	2	4
e823002	5	2	4
e823003	5	1	4
e823004	5	2	5
e823005	5	1	4
e845001	4	2	4
e845002	4	3	4
e845003	4	2	3
e845004	4	2	4
e845005	4	2	4
e939001	4	1	4
e934001	5	1	4
e934002	4	2	4
e934003	4	1	4
e934004	4	2	4
e934005	4	1	4
e832001	3	2	3
e832002	3	2	3
e832003	3	2	3
e832004	3	2	3
e832005	3	2	3
e221001	5	4	4
e221002	5	2	4
e221003	5	2	4
e221004	5	2	4
e221005	5	4	4
e157001	4	1	4
e157002	4	1	3
e340001	1	2	3
e340002	1	2	4
e340003	4	1	3
e340004	4	2	5
e340005	3	1	3
e980001	5	3	4
e980002	5	2	4
e980003	4	2	4
e980004	4	4	4
e980005	4	2	4
e499001	3	2	4
e499002	3	2	4
e499003	3	2	4
e499004	3	2	4
e499005	3	2	4
e319001	5	4	1
e319002	5	4	4
e319003	3	3
e319004	3	4
e319005	3	4
e610001	3	2	4
e610002	3	2	4
e610003	3	1	4
e610004	3	1	4
e610005	3	2	4
e959001	5	2	4
e807001	3	3	4
e807002	5	2	5
e807003	3	2	3
e807004	5	1	4
e807005	3	2	4
e563001	3	2	4
e563002	3	1	4
e777001	4	3	4
e527001	4	4	3
e527002	4	2	3
e657001	4	2	4
e657002	4	1	4
e563003	4	2	4
e563004	4	3	4
e527005	4	3	4
e333001	4	1	4
e333002	3	2	5
e612001	5	2	4
e212001	5	2	3
e477001	5	2	4
e477002	5	2	4
e477003	5	2	4
e477004	5	2	4
e477005	5	2	5
e416001	3	3	3
e416002	3	2	4
e416003	3	3	5
e416004	3	1	3
e416005	3	2	4
e825001	3	2	4
e825002	3	1	4
e825003	3	1	4
e825004	3	2	4
e825005	3	2	4
e994001	5	1	4
e994002	4	1	4
e995001	4	2	4
e995002	4	2	4
e995003	4	2	4
e935001	5	2	4
e935002	4	2	4
e935003	4	1	4
e935004	4	2	4
e935005	5	2	4
e367001	5	2	4
e367002	5	1	4
e230001	3	2	5
e230002	4	2	5
e230003	3	3	4
e230004	3	1	4
e230005	3	1	4
e249001	3	2	4
e249002	3	2	4
e249003	3	2	4
e202001	3	3	4
e202002	3	2	4
e202003	3	2	4
e916001	5	1	5
e916002	3	1	4
e916003	3	1	4
e916004	3	2	5
e847001	5	1	4
e847002	5	2	5
e847003	5	2	5
e128001	5	2	4
e128002	5	2	4
e128003	3	1	4
e128004	5	2	4
e128005	5	1	4
e661001	5	2	4
e921001	3	3	5
e921002	3	1	4
e921003	3	1	4
e921004	3	3	3
e921005	3	2	5
e798001	5	1	4
e798002	5	2	4
e798003	5	2	4
e798004	5	2	4
e798005	4	2	4
e979001	3	1	4
e979002	3	2	5
e979003	3	2	5
e979004	3	2	4
e979005	4	1	4
e565001	5	2	4
e565002	3	2	4
e565003	5	3	4
e565004	3	1	4
e565005	5	2	4
e950001	4	2	5
e950002	4	1	4
e950003	4	2	4
e950004	4	2	4
e950005	4	1	4
e193001	4	3	4
e193002	4	2	4
e193003	3	2	5
e605001	4	1	4
e605002	3	2	4
e605003	3	2	4
e544001	5	2	4
e544002	5	1	5
e544003	4	3	4
e544004	4	3	3
e544005	5	2	4
e974001	5	1	5
e974002	3	1	4
e974003	3	1	5
e974004	5	1	4
e974005	3	1	4
e222001	3	2	5
e555001	5	2	4
e851001	4	3	4
e851002	4	2	4
e851003	4	3	4
e851004	4	2	4
e851005	4	3	4
e309001	3	2	4
e309002	3	2	4
e309003	3	2	4
e309004	5	2	4
e309005	5	2	4
e595001	3	2	4
e595002	3	2	4
e595003	3	1	3
e595004	3	1	4
e133001	4	2	4
e133002	3	2	4
e133003	2	2	4
e133004	3	1	4
e133005	3	1	4
e279001	5	3	5
e279002	3	3	4
e279003	3	3	4
e279004	5	3	5
